# Supplementary material
Source: Springer Nature journal article supplement (https://www.springermedizin.de/resource/supplementary/13014_2010_294_MOESM1_ESM.pdf/9633374)
Supplement: MOESM1 [file 9633374]

Assessed for eligibility  
(N=57)

Preoperative CTRT  
(N=57)

Not operated  
(N=1)

Surgery  
(N=56)

Without postoperative CT  
(N=12)

Postoperative CT  
(N=44)

Analysed  
(N=57)
